1 The UCSC Repeat Browser allows discovery and visualization of evolutionary conflict  
2 across repeat families

3

4 Jason D. Fernandes<sup>1,2,3</sup>, Armando Zamudio-Hurtado<sup>1,4</sup>, W. James Kent<sup>1</sup>, David  
5 Haussler<sup>1,2,3\*</sup>, Sofie R. Salama<sup>1,2,3\*</sup>, Maximilian Haeussler<sup>1\*</sup>

6

7 <sup>1</sup>Genomics Institute, University of California, Santa Cruz

8 <sup>2</sup>Department of Biomolecular Engineering, University of California, Santa Cruz

9 <sup>3</sup>Howard Hughes Medical Institute, University of California, Santa Cruz

10 <sup>4</sup>Big Data to Knowledge Program, California State University, Monterey Bay

11 \*Co-senior authors

12

13

14

15

16

17

18

19

20

21

22 \*correspondence to [max@soe.ucsc.edu](mailto:max@soe.ucsc.edu) or [ssalama@ucsc.edu](mailto:ssalama@ucsc.edu)

## 23 **ABSTRACT**

24

### 25 **Background**

26 Nearly half the human genome consists of repeat elements, most of which are  
27 retrotransposons, and many of these sequences play important biological roles.  
28 However repeat elements pose several unique challenges to current bioinformatic  
29 analyses and visualization tools, as short repeat sequences can map to multiple  
30 genomic loci resulting in their misclassification and misinterpretation. In fact, sequence  
31 data mapping to repeat elements are often discarded from analysis pipelines.  
32 Therefore, there is a continued need for standardized tools and techniques to interpret  
33 genomic data of repeats.

34

### 35 **Results**

36 We present the UCSC Repeat Browser, which consists of a complete set of human  
37 repeat reference sequences derived from the gold standard repeat database  
38 RepeatMasker. The UCSC Repeat Browser contains mapped annotations from the  
39 human genome to these references, and presents all of them as a comprehensive  
40 interface to facilitate work with repetitive elements. Furthermore, it provides processed  
41 tracks of multiple publicly available datasets of biological interest to the repeat  
42 community, including ChIP-SEQ datasets for KRAB Zinc Finger Proteins (KZNFs) – a  
43 family of proteins known to bind and repress certain classes of repeats. Here we show  
44 how the UCSC Repeat Browser in combination with these datasets, as well as  
45 RepeatMasker annotations in several non-human primates, can be used to trace the  
46 independent trajectories of species-specific evolutionary conflicts.

47

## 48 **Conclusions**

49 The UCSC Repeat Browser allows easy and intuitive visualization of genomic data on  
50 consensus repeat elements, circumventing the problem of multi-mapping, in which  
51 sequencing reads of repeat elements map to multiple locations on the human genome.  
52 By developing a reference consensus, multiple datasets and annotation tracks can  
53 easily be overlaid to reveal complex evolutionary histories of repeats in a single  
54 interactive window. Specifically, we use this approach to retrace the history of several  
55 primate specific LINE-1 families across apes, and discover several species-specific  
56 routes of evolution that correlate with the emergence and binding of KZNFs.

57

## 58 **Keywords**

59 repeats; retrotransposon; genomics; krab zinc finger proteins; evolution;

60

## 61 **INTRODUCTION**

62

63 Transposable elements are significant drivers of eukaryotic genome evolution. In  
64 humans and other primates, transposons constitute nearly half the genome; the majority  
65 of these repeat elements are retrotransposons, although some DNA transposons are  
66 also present. Despite the high repeat content of the human genome, many genomic  
67 analyses struggle to deal with these regions as sequencing reads can often be assigned  
68 nearly equally well to multiple regions in the genome. Masking or filtering these reads is  
69 often considered a “conservative” approach in that it avoids mis-assigning the genomic  
70 location of a read, but it prevents the discovery of important biology occurring at repeat

71 elements<sup>1</sup>. Indeed, many repeats already have established roles in important biological  
72 processes, complex behavioral phenotypes, and disease<sup>2-5</sup>.

73

74 One of the major challenges in proper repeat-analysis is establishing a set of  
75 standardized sequences, nomenclature and annotation sets that can be universally  
76 understood by the scientific community. The most commonly used databases and tools  
77 to study repeats are Repbase<sup>6</sup> and RepeatMasker<sup>7</sup>. Repbase began as a hand-curated  
78 list in 1992 of 53 prototypic repeat sequences identified in the human genome<sup>8</sup>. By  
79 2015, it contained more than 38,000 sequences in 134 species<sup>6</sup>, making curation and  
80 comprehension of each repeat family a daunting challenge. RepeatMasker is a program  
81 that screens DNA (e.g. a newly sequenced genome) for repeat elements.

82 RepeatMasker utilizes a specialized version of RepBase (RepBase RepeatMasker  
83 Edition) as input to identify repeats within a genome. RepeatMasker's final output also  
84 represents additional optimizations (e.g. building full length repeat elements from  
85 smaller subparts, generalization (grouping together) of similar elements, and  
86 specialization (using information about repeat structure)) designed to improve the speed  
87 and quality of repeat detection (Figure 1A).

88

89 Although a variety of tools and methods already exist to study repeats<sup>9</sup>, tools to  
90 dynamically visualize genomic data and interact with existing annotation sets on repeats  
91 (e.g. protein coding regions, conservation with other sequences and the list of matches  
92 in the genome) are currently underdeveloped. Generating and mapping to a consensus  
93 version of individual repeats has proven successful in illustrating novel biological

94 features of transposon insertions, but has largely been limited to static visualizations on  
95 targeted elements of interest and specific families of these repeats<sup>10,11</sup>.

96

97 Here we present the UCSC Repeat Browser, which simplifies analysis of genomic data  
98 on repeats by providing automatically generated consensus sequences for all human  
99 repeat element classifications within RepeatMasker. The Repeat Browser overlays a  
100 precomputed set of comprehensive annotations in an interactive genomic browser  
101 environment (Figure 1). Further, we demonstrate the utility of the Repeat Browser in  
102 uncovering and illustrating evolutionary conflict between a primate specific class of  
103 retrotransposons and their repressors.

104

## 105 **IMPLEMENTATION**

### 106 **Generating Reference Sequences for Human Repeats**

107 We first generated consensus reference sequences for each repeat family listed in the  
108 RepeatMasker annotation of the human genome (hg19). To do so, we downloaded all  
109 nucleotide sequences and their annotations in the RepeatMasker annotation track on  
110 the UCSC Human Genome Browser (hg19). We observed that extremely long repeats  
111 tended to represent recombination or misannotation events and therefore removed the  
112 longest 2% of sequences in all classes. We then aligned the 50 longest remaining  
113 sequences of each class, as this produced a tractable number of sequences that  
114 allowed manual inspection of each alignment, and because insertions relative to the  
115 consensus are otherwise invisible when plotted on shorter sequences. For each repeat  
116 family, these fifty sequences were realigned with MUSCLE<sup>12</sup> to create a consensus

117 sequence. Each of these consensus sequences was then stored as a “reference” in the  
118 Repeat Browser in a manner analogous to a single chromosome on the UCSC Human  
119 Genome Browser<sup>13,14</sup>. Each alignment is provided as a link in a “consensus alignment”  
120 track for additional visual inspection by the user.

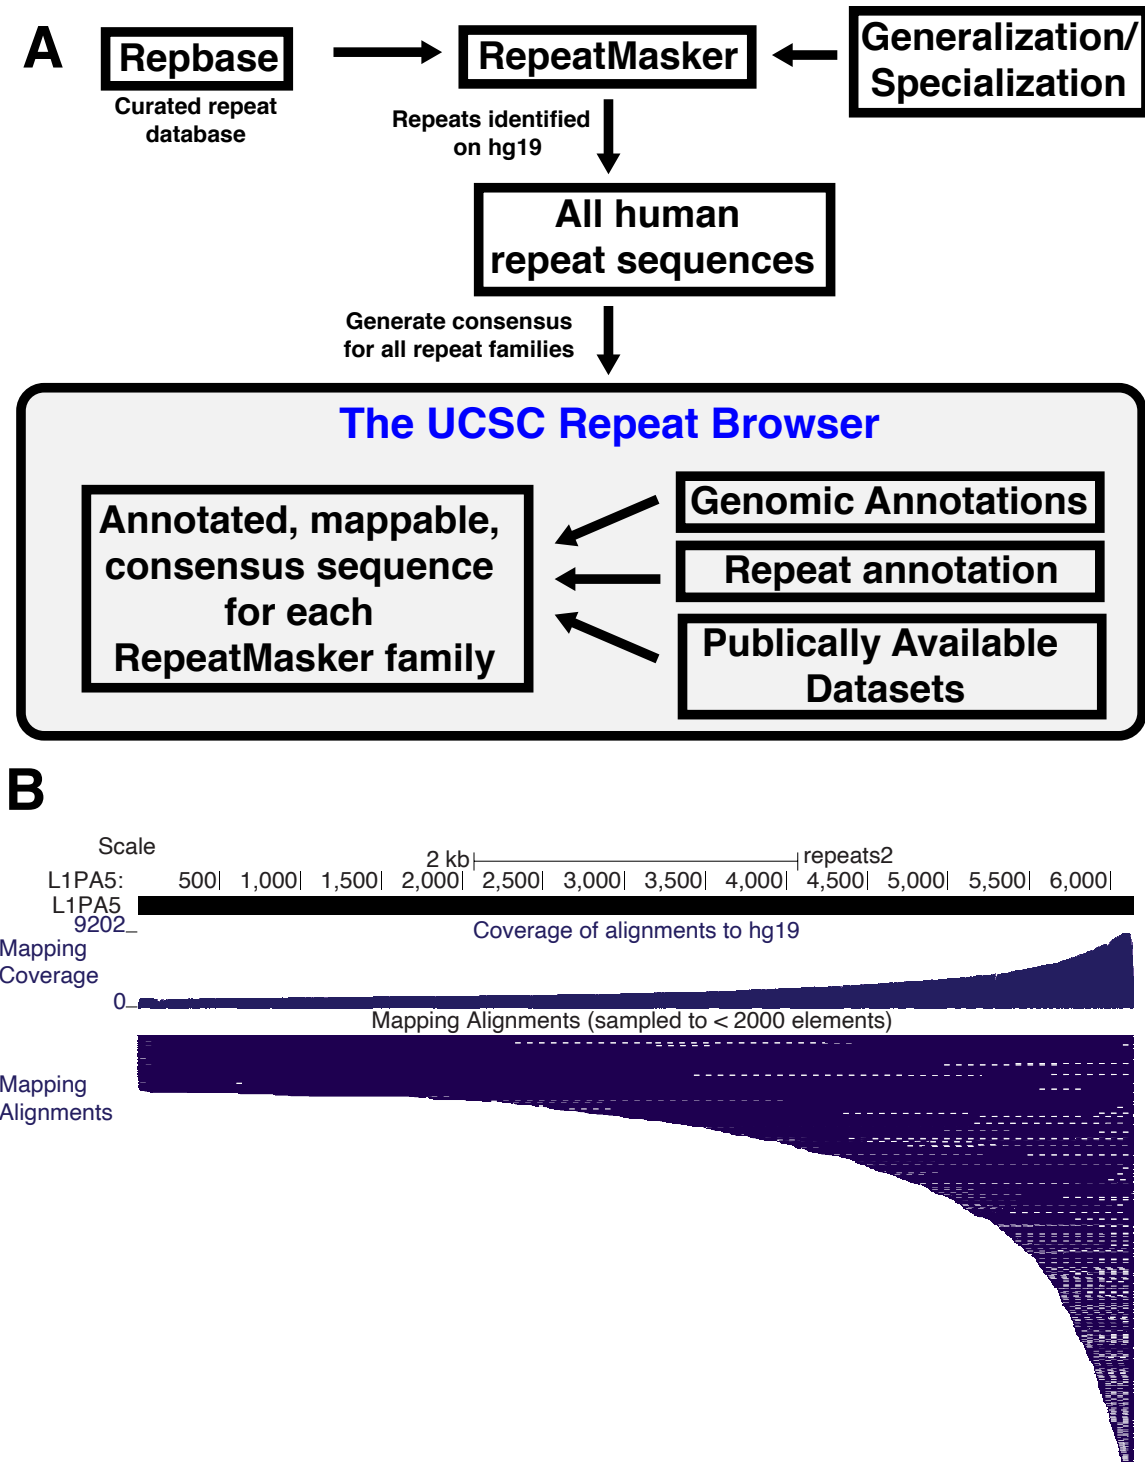

FIGURE 1: Building the UCSC Repeat Browser. A) Workflow for building the UCSC Repeat Browser. Repeat annotations and sequences are taken directly from RepeatMasker tracks across the human genome and used to build reference consensus sequences for every repeat family. Existing genomic annotations are then mapped to these consensus. B) Mapping of all individual L1PA5 instances to the consensus. A majority of L1PA5 sequences in the human genome only

contain the 3' end as evidenced by the coverage per base (mapping coverage) and alignments of individual instances (mapping alignments).

121

## 122 **Annotation of each repeat class**

123 For each repeat family, the consensus was mapped back to all of its repeats with  
124 BLAT<sup>15</sup>. From this process, we generated a coverage plot illustrating the relative  
125 representation of the consensus from each genomic instance (Figure 1B). For example,  
126 the primate-specific LINE-1 sub-family, L1PA5, shows the expected distribution: most  
127 of the individual L1PA5 instances, are short 3' truncations, meaning that most genomic  
128 loci annotated as L1PA5 do not contain the 5' portion. Therefore the 3' end of the  
129 consensus is found relatively more often across the human genome (Figure 1B). We  
130 also ran Tandem Repeats Finder<sup>16</sup> and the EMBOSS ORF finder<sup>17</sup> on these consensus  
131 sequences in order to automatically annotate each consensus. We similarly aligned the  
132 RepeatMasker Peptide Library<sup>18</sup> with BLAST<sup>19</sup> and each of the original genomic  
133 sequences with BLAT<sup>15</sup> to each consensus.



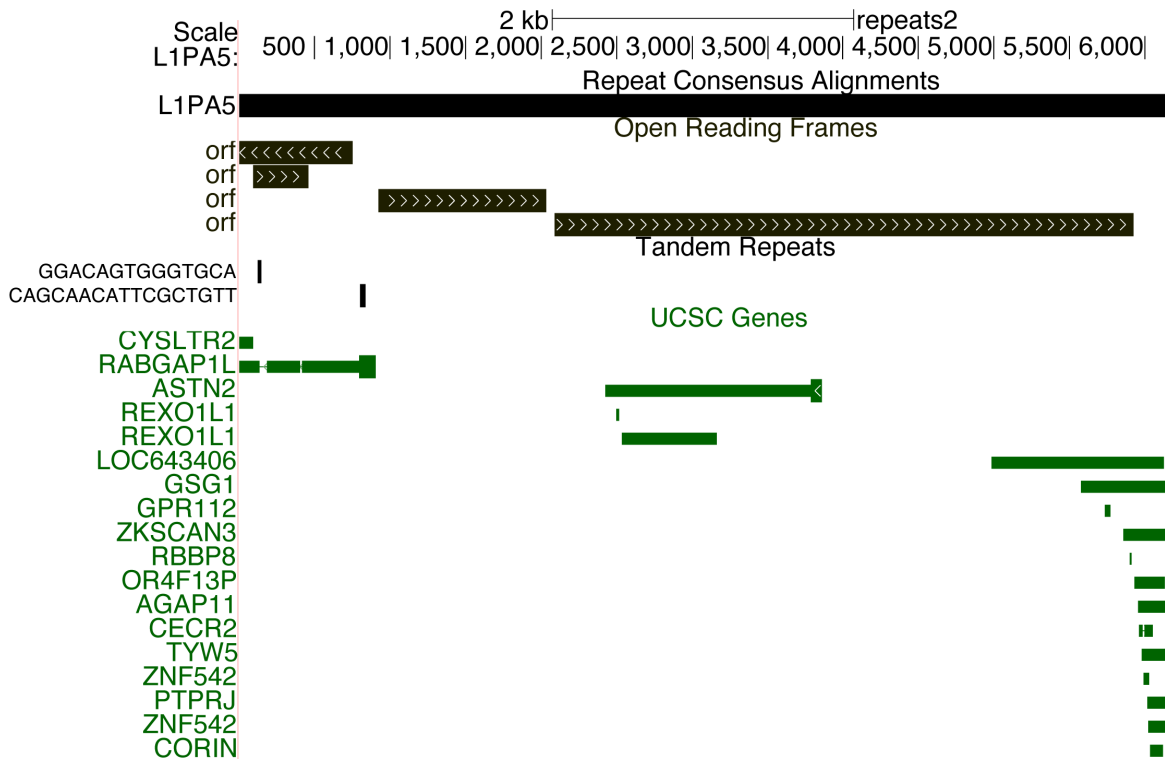

FIGURE 2: Mapping of existing annotations and detection of repeat features. Annotation sets (e.g. UCSC Genes) that intersect RepeatMasker annotations were lifted from hg19 to the Repeat Browser consensus. Shown here are all genes that contain L1PA5 sequence as well as ORFs (detected by EMBOSS getorf) and tandem sequence repeats detected within the L1PA5 consensus detected by Tandem Repeat Finder.

134

135 Our alignment of individual repeat elements in the genome to their respective  
 136 consensus sequence allows us to map any genome annotation to the genome  
 137 consensus sequence, a process more generally known as “lifting”. In this way, human  
 138 genes that contain repeat sequence (as annotated by GENCODE<sup>20</sup> and UCSC genes<sup>21</sup>)  
 139 were “lifted” to each consensus sequences (Table 1). Figure 2 shows the results for  
 140 L1PA5 elements. As expected, L1PA5 sequences that have been incorporated into  
 141 protein coding genes tend to derive from the untranslated regions (UTRs) of the repeats  
 142 and have incorporated into the UTRs of the protein coding genes. Finally, although the  
 143 Repeat Browser consensus sequences are built from hg19 RepeatMasker annotations,  
 144 we also generated mappings of each consensus to each corresponding repeat instance

145 in hg38. The result of these procedures produces a fully annotated and interactive  
146 consensus sequence that requires minimal prior knowledge of the genomic organization  
147 of the repeat being analyzed and at the same time allows lifting of any genome  
148 annotation from either hg19 or hg38.  
149

| <b>Track</b>                                               | <b>Description</b>                                                                                              |
|------------------------------------------------------------|-----------------------------------------------------------------------------------------------------------------|
| Mapping Alignments                                         | Alignments of each individual repeat instance in hg19 back to the Repeat Browser consensus.                     |
| Mapping Coverage                                           | A coverage plot for the mapping alignments.                                                                     |
| Conserved Elements                                         | Highly conserved genomic sequences in vertebrates, placental mammals and primates lifted to the Repeat Browser. |
| RepeatMasker Proteins                                      | Protein products of the repeat element as annotated in RepeatMasker records.                                    |
| ORFs                                                       | Predicted ORFs                                                                                                  |
| Other Cons Aln                                             | Alignment of all other Repeat Browser Consensuses against the currently viewed consensus.                       |
| Repeat Consensus Alignments                                | Alignment of all repeats from the RepBase RepeatMasker Libraries                                                |
| Tandem Repeats                                             | Detected tandem sequence repeats within the consensus full-length repeat elements.                              |
| ENCODE Tracks                                              | DNase mapping, histone marks and TF ChIP-SEQ from ENCODE lifted to the Repeat Browser.                          |
| KZNF Tracks (Imbeault/Trono 2017 & Schmittges/Hughes 2016) | Lifting of reprocessed data from large KZNF ChIP-SEQ screens.                                                   |
| TF Differentiation Data (Tsankov 2014)                     | Lifting of large scale ChIP-SEQ dataset from differentiation time course across multiple cell types.            |
| Stem Cell State Data (Theunissen 2016)                     | Lifting of reprocessed data from primed and naïve human pluripotent stem cells.                                 |

150

151

## 152 **Mapping of Existing Genomic Datasets**

153 We also mapped genomic loci bound by histone-modifying enzymes from ENCODE  
154 datasets<sup>22</sup> as well as large-scale ChIP-SEQ collections KRAB Zinc Finger Proteins  
155 (KZNFs)<sup>23,24</sup> to the Repeat Browser. KZNFs are particularly compelling factors as they  
156 engage in evolutionary “arms races” in which KZNFs evolve unique DNA binding  
157 properties to bind and repress retrotransposons<sup>10,25</sup>. These retrotransposons then  
158 accumulate mutations that allow evasion of KZNF-mediated repression<sup>10</sup>. In order to  
159 map this ChIP-SEQ data to the Repeat Browser, we first downloaded raw ChIP-SEQ  
160 reads from the Sequence Read Archive (SRA)<sup>26</sup>, mapped them to the reference  
161 genome (hg19) using bowtie2<sup>27</sup> and called peaks using macs2<sup>28</sup> (Figure 3A). After this  
162 standard genomic mapping and peak calling, we then took the peaks of these these  
163 DNA-binding summits that overlapped a repeat element as annotated in the  
164 RepeatMasker track, extended them by 5 nt in both directions, and used BLAT to map  
165 them to the appropriate (as determined by RepeatMasker annotation) Repeat Browser  
166 consensus sequence. In essence, this approach leverages each repeat instance as a  
167 technical replicate, with the mapping to the consensus representing a combination of  
168 many genomic “replicates” (Figure 3A) of DNA binding summits called on individual  
169 instances of a repeat family that individually produce a noisy set of mappings; however  
170 hundreds of them combined yield a clear overall signal, better identifying the actual  
171 binding site. We call this “summit of summits” (obtained by combining the summits on  
172 individual transposon instances into a single summit on the Repeat Browser consensus)  
173 the “meta-summit”. In order to determine these “meta-summits”, we ran our peak caller  
174 (macs2) on the repeat consensus to generate a list of “meta-summits” which represent

175 the most likely location of the DNA binding site for a specific DNA-binding factor. We  
 176 then generated a track which summarizes these meta-peaks for each consensus  
 177 sequence allowing easy and quick determination of factors with correlated binding  
 178 patterns (Figure 3B; visualized on Human Endogenous Retrovirus H (HERV-H)).

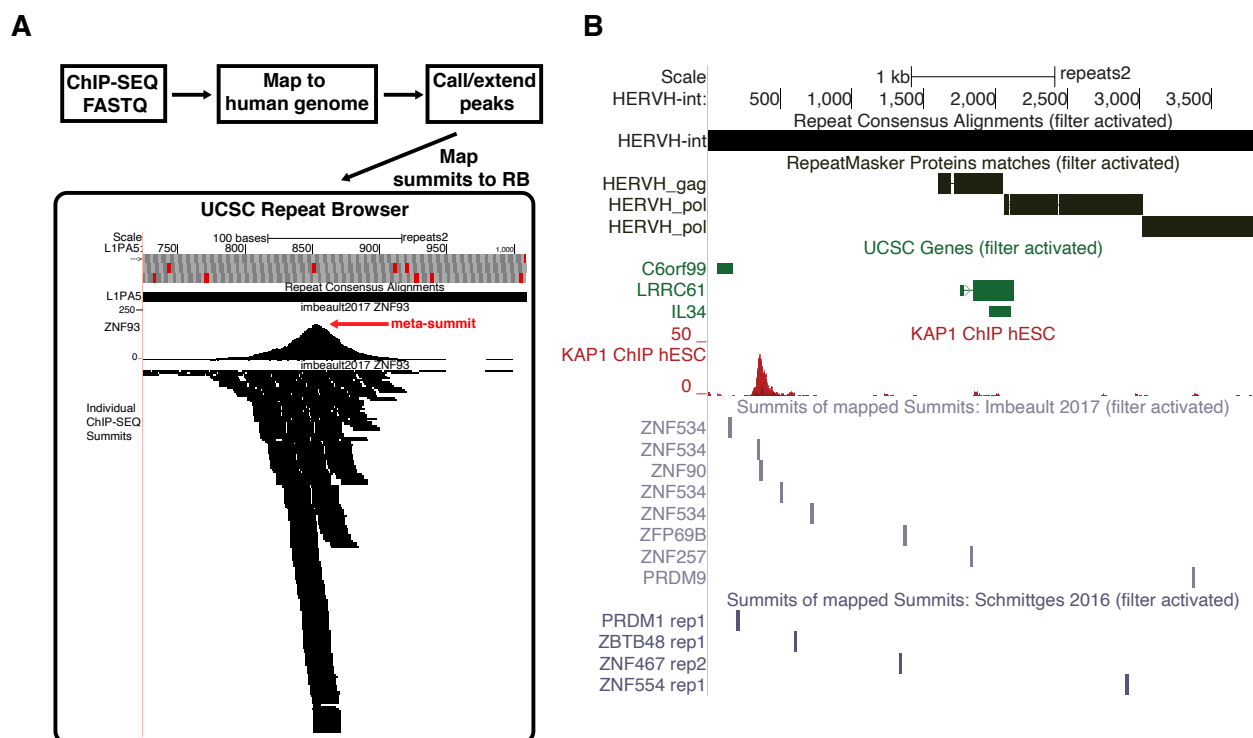

FIGURE 3: Mapping of KZNF ChIP-SEQ data to the UCSC Repeat Browser. A) Workflow for analyzing KZNF ChIP-SEQ. Data from existing collections was downloaded from SRA, analyzed via standard ChIP-SEQ workflows and the resulting summits mapped back to the RB for analysis. Mapping of individual summits produces a “meta-summit” (red arrow) that can be used for downstream analysis and which is stored separately in another annotation track. B) Example of a repeat family, HERVH-int (a primate endogenous retrovirus) with lifted annotations and datasets. Shown are tracks of annotated ORFs, gene overlaps, Kap1 ChIP-SEQ coverage and KZNF meta-summits.

179

180

## 181 RESULTS

### 182 Comparative Analysis of L1PA elements

183 In order to demonstrate the power of the UCSC Repeat Browser, we studied the

184 evolution of recent L1PA families. The L1PA lineage is a group of LINE-1

185 retrotransposon families specific to primates. These elements are fully autonomous, and  
186 encode proteins (ORF1 and ORF2) responsible for reverse transcription and re-  
187 integration of the retrotransposon. L1PA families evolve in bursts; higher numbers (e.g.  
188 L1PA17) indicate ancient evolutionary origins, as evidenced by shared copies across  
189 species (Fig 4A). Lower numbers indicate more recent activity and are derived from the  
190 older, higher number families (note L1PA1 is also known as L1HS, human-specific)<sup>29</sup>.  
191 Although this nomenclature generally corresponds to speciation events on the  
192 phylogenetic tree of the hosts of L1PA retrotransposons, many families had overlapping  
193 periods of activity meaning that the correspondence is not exact (e.g. it is possible that  
194 a few L1PA3 instances are present in gibbon, despite their major burst of activity on the  
195 human lineage occurring after the human-gibbon divergence)<sup>30</sup>.

196

## 197 **Comparison of Primate Repeat Elements Reveals a Large Number of Gibbon** 198 **Specific L1PA4 Elements**

199 In order to trace the evolution of L1PAs in different species, we downloaded the  
200 complete sequences for every L1PA7 and younger L1PA family, as annotated in their  
201 UCSC Genome Browser RepeatMasker tracks, in rhesus macaque (rheMac10), gibbon  
202 (nomLeu3), orangutan (ponAbe3), chimp (panTro6), gorilla (gorGor5), bonobo  
203 (panPan2) and human (hg38). We further restricted our analysis to only full-length  
204 elements by filtering out elements less than 5000 nucleotides in length.

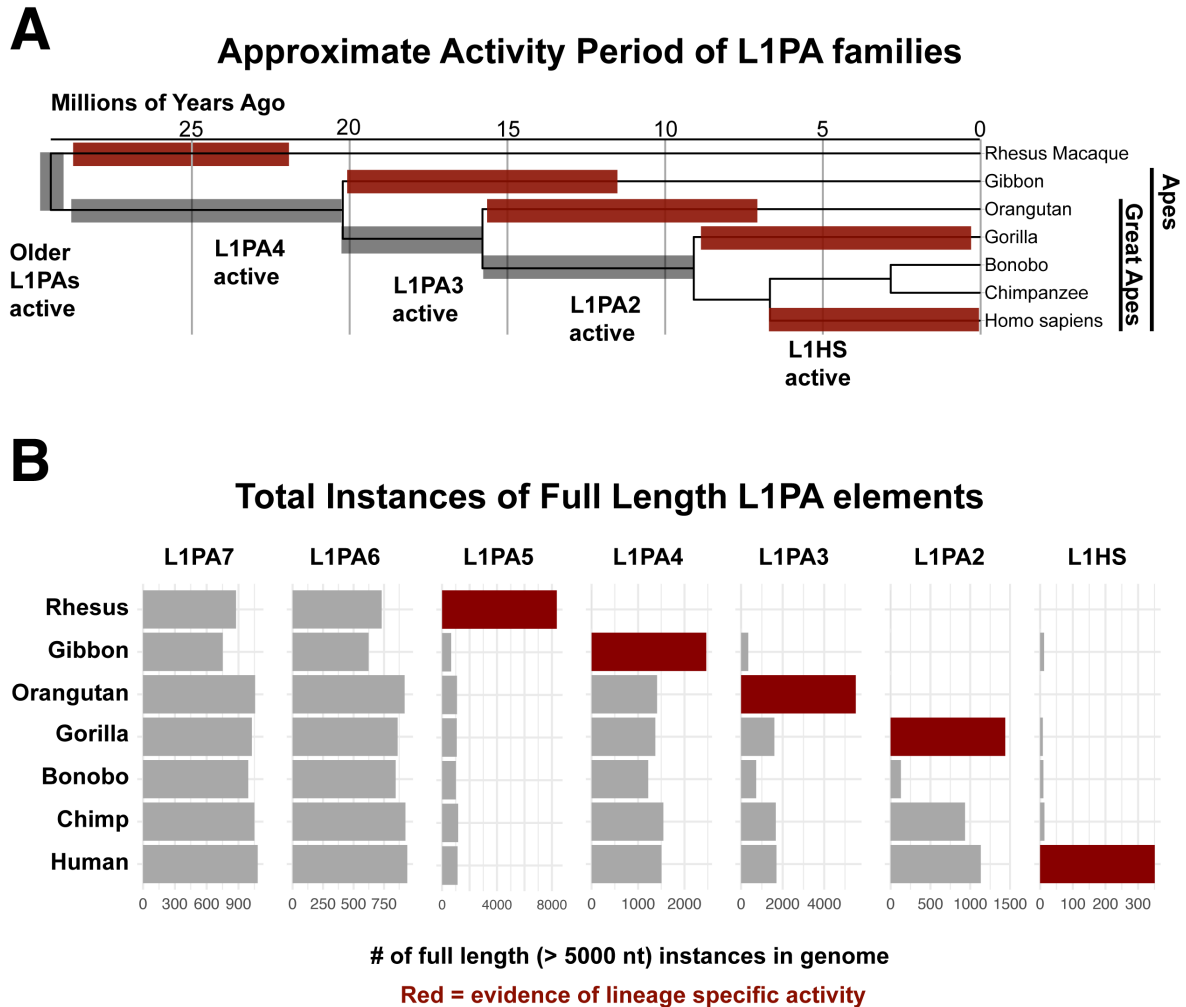

FIGURE 4: Comparative analysis of L1PA elements. A) Phylogeny and nomenclature of L1PA elements. Older elements have higher numbers and families can expand in a manner that will be conserved between species (grey) or lineage-specific (red). B) Counts of full length L1PA instances extracted from UCSC Repeat Masker tracks. Note for Rhesus (rheMac10), L1PA5 counts represent a sum of rhesus-specific elements (labeled as L1PA5 in RepBase, L1\_RS\* by RepeatMasker). Families in red expand greatly compared to families in grey, providing evidence of lineage-specific expansion.

205 As expected, the number of elements in older families were largely similar amongst all  
 206 species that shared a common ancestor when the retrotransposon was active: for  
 207 instance, L1PA7, active prior to the emergence of the last common ancestor of all  
 208 primates in this study, was found at a relatively constant amount in all genomes (Figure  
 209 4B). On the other hand, human specific elements were found only (barring a few likely  
 210 mis-annotations) in the human genome. Curiously, in certain species (gibbon,

211 orangutan and gorilla) instances of retrotransposon families that were active near their  
212 divergence from human, were present in much greater copy number (Figure 4B).  
213 Specifically, the number of L1PA4 elements was greater in gibbon than all other apes,  
214 while a similar pattern was seen for L1PA3 and orangutan, and L1PA2 and gorilla.  
215 These results are consistent with these primates having lineage specific expansion of  
216 these elements in a manner distinct from humans. Notably, bonobos had a markedly  
217 lower number of L1PA2 elements which may indicate stronger repression of these  
218 elements by a species-specific factor; however, the bonobo assembly was one of the  
219 older, short-read primate assemblies used in this study, and therefore the lack of L1PA2  
220 elements may simply reflect greater difficulty in resolving these regions in the genome  
221 assembly. Note also that the UCSC track for rheMac10 contains no annotated instances  
222 of L1PA5, but this simply reflects the fact that RepeatMasker taxonomy splits the L1PA5  
223 family into L1\_RS families that are rhesus-specific compared to the other primates in  
224 this study<sup>31</sup>.

225

### 226 **All apes display evidence of ZNF93 evasion in the 5'UTR of L1PA**

227 In order to examine the selection pressures that might explain species-specific  
228 expansion and restriction of L1PA elements, we combined our primate L1PA analysis  
229 with the ChIP-SEQ data of KRAB Zinc Finger Proteins (KZNFs) on the Repeat  
230 Browser<sup>23,32</sup>. KZNFs rapidly evolve in order to directly target retrotransposons and  
231 initiate transcriptional silencing of these elements. We previously demonstrated that a  
232 129bp deletion occurred and fixed in the L1PA3 subfamily (and subsequent lineages of  
233 L1PA) in order to evade repression mediated by ZNF93. In order to discover additional

234 cases where a retrotransposon may have deleted a portion of itself to escape KZNF-  
235 mediated repression, we analyzed L1 sequences with the following characteristics: 1)  
236 deletion events proximal to KZNF binding sites, and 2) increasing number of  
237 retrotransposon instances with that deletion (demonstrating increased retrotransposon  
238 activity). Comparisons of these events across primate species, provides evidence for  
239 unique, species-specific mechanisms of escape.

240



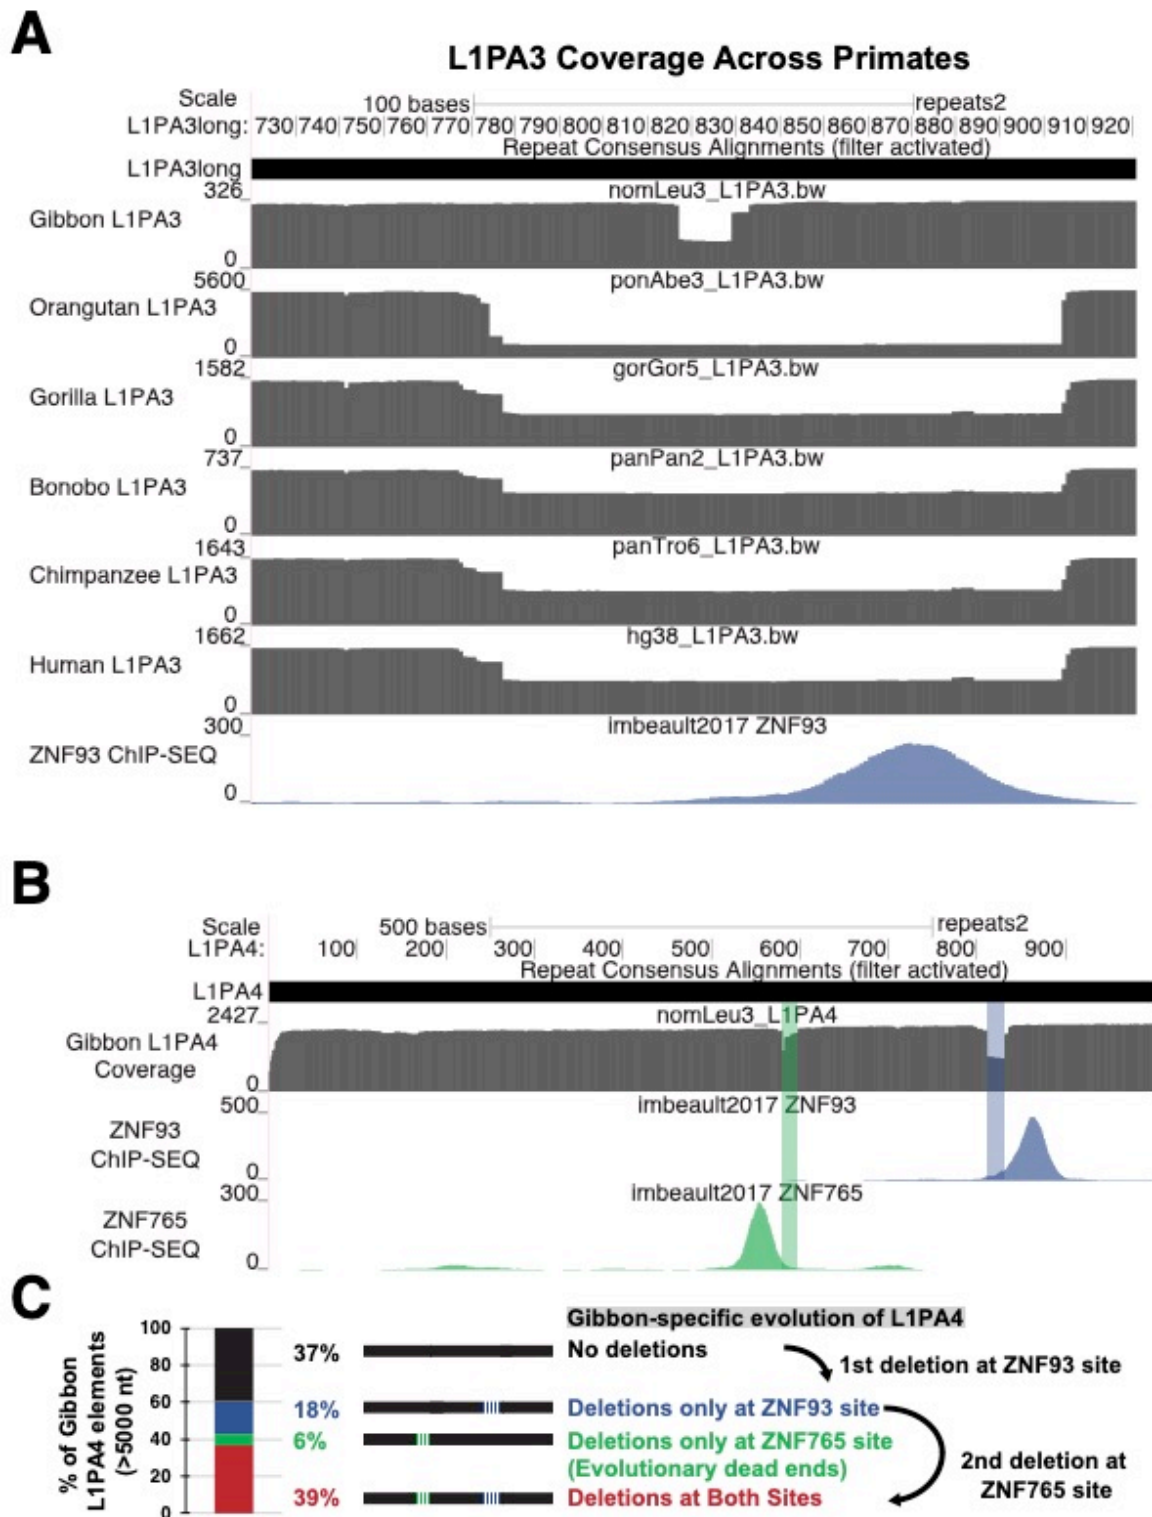

FIGURE 5: Comparative analysis of L1PA3 & 4 elements in apes and great apes. A) Coverage tracks for all full length ape L1PA3 elements mapped to the human consensus. Gibbons have few L1PA3 elements that are likely misannotated L1PA4 elements and a unique deletion in the ZNF93 binding (blue) region. All great apes (all shown except gibbon) exhibit a shared deletion,

evidenced by a coverage drop over 129 bp. B) Coverage map of gibbon L1PA4 elements demonstrates a different path of ZNF93 evasion (20 bp deletion) as well as a second region spanning 22 bp near the major ZNF765 binding site (green). (Below) Analysis of mutational patterns in gibbon demonstrates that the 20 bp ZNF93-associated deletion likely occurred first in gibbon L1PA4 as most L1PA4s with ZNF765-associated deletions also contain a ZNF93-associated deletion.

241

242 In order to look for these signatures of L1PA families escaping repression, we used

243 BLAT to align each individual full-length (>5000 nt) primate L1PA of the same class

244 instance to the human Repeat Browser consensus from the primate genomes under

245 study. We then generated coverage tracks of these full-length elements mapped to the

246 human consensus for each species and each L1PA family. The ZNF93-mediated

247 deletion is clearly visible as evidenced by a massive drop in coverage in the 129-bp

248 region in human L1PA3 instances (Figure 5A). This same drop in coverage is found in

249 all great apes (orangutan, gorilla, bonobo, chimp, and human) confirming that this event

250 occurred in a common ancestor. Notably a small number (~300) of L1PA3 elements

251 were identified in gibbon; however these elements display a different drop in coverage

252 (20 bp long) near the ZNF93 binding site, The majority of these gibbon “L1PA3”

253 instances do not lift to the human genome (or lift to older L1PA5 and L1PA4 elements)

254 suggesting they are mis-annotations or gibbon-specific L1PA expansions. Therefore, we

255 examined gibbon L1PA4 elements on the Repeat Browser and found that the small 20

256 bp deletion - at the base of the ZNF93 peak – first occurred in Gibbon L1PA4 elements

257 (Figure 5B), after the human-gibbon divergence (since humans and other great apes do

258 not have this deletion), and likely gave rise to gibbon-specific L1PAs. Elements with this

259 20-bp deletion were likely able to evade ZNF93, and may also hold a selective

260 advantage over more drastic 129 bp L1PA3 deletions. Indeed, elegant work from the

261 Moran lab has recently shown that the 129bp deletion in human L1PA3 elements alters

262 L1PA splicing in a manner that can generate defective spliced integrated  
263 retrotransposed elements (SpIREs)<sup>33</sup>: the smaller deletion found in gibbons may avoid  
264 generating these intermediates. Additionally, gibbon L1PA4 elements also experience a  
265 smaller coverage drop (typically near the ZNF765 binding site (Figure 5B). Coverage  
266 drops in this area are found predominantly in L1PA4 instances with the ZNF93 binding  
267 site already deleted, indicating that this deletion (and the presumed escape from  
268 ZNF765 control) occurred after escape from ZNF93 control (Figure 5C).

269

### 270 **Novel Orangutan-Specific Deletions are Visible on the UCSC Repeat Browser**

271 L1PA3 elements display an increased copy number in the orangutan genome,  
272 suggesting that these elements also had a lineage specific expansion, driven by escape  
273 from KZNFs or other restriction factors. Aligning of orangutan L1PA3 elements on the  
274 Repeat Browser L1PA3 consensus displayed a clear 11 bp deletion ~230 bp into the 5'  
275 UTR that is not present in human, chimp or bonobo elements (Fig 6A). However,  
276 analysis of existing KZNF ChIP-SEQ data, shows no specific factor that clearly  
277 correlates with this deletion. We may simply lack ChIP-SEQ data for the appropriate  
278 factor (including the possibility that the KZNF driving these changes evolved specifically  
279 within the orangutan lineage) to explain the evolutionary pattern seen in these  
280 orangutan-specific elements; alternatively, this mutation might alter some other aspect  
281 of L1PA fitness (e.g. splicing). Regardless, L1PA3 elements with this deletion were  
282 highly successful in spreading throughout the orangutan genome. Furthermore, L1PA3  
283 instances with deletions in this region also harbor the 129 bp ZNF93 deletion,

284 suggesting that this 11 bp deletion occurred after orangutan L1PA3 elements escaped  
 285 ZNF93 control (Fig 6B).

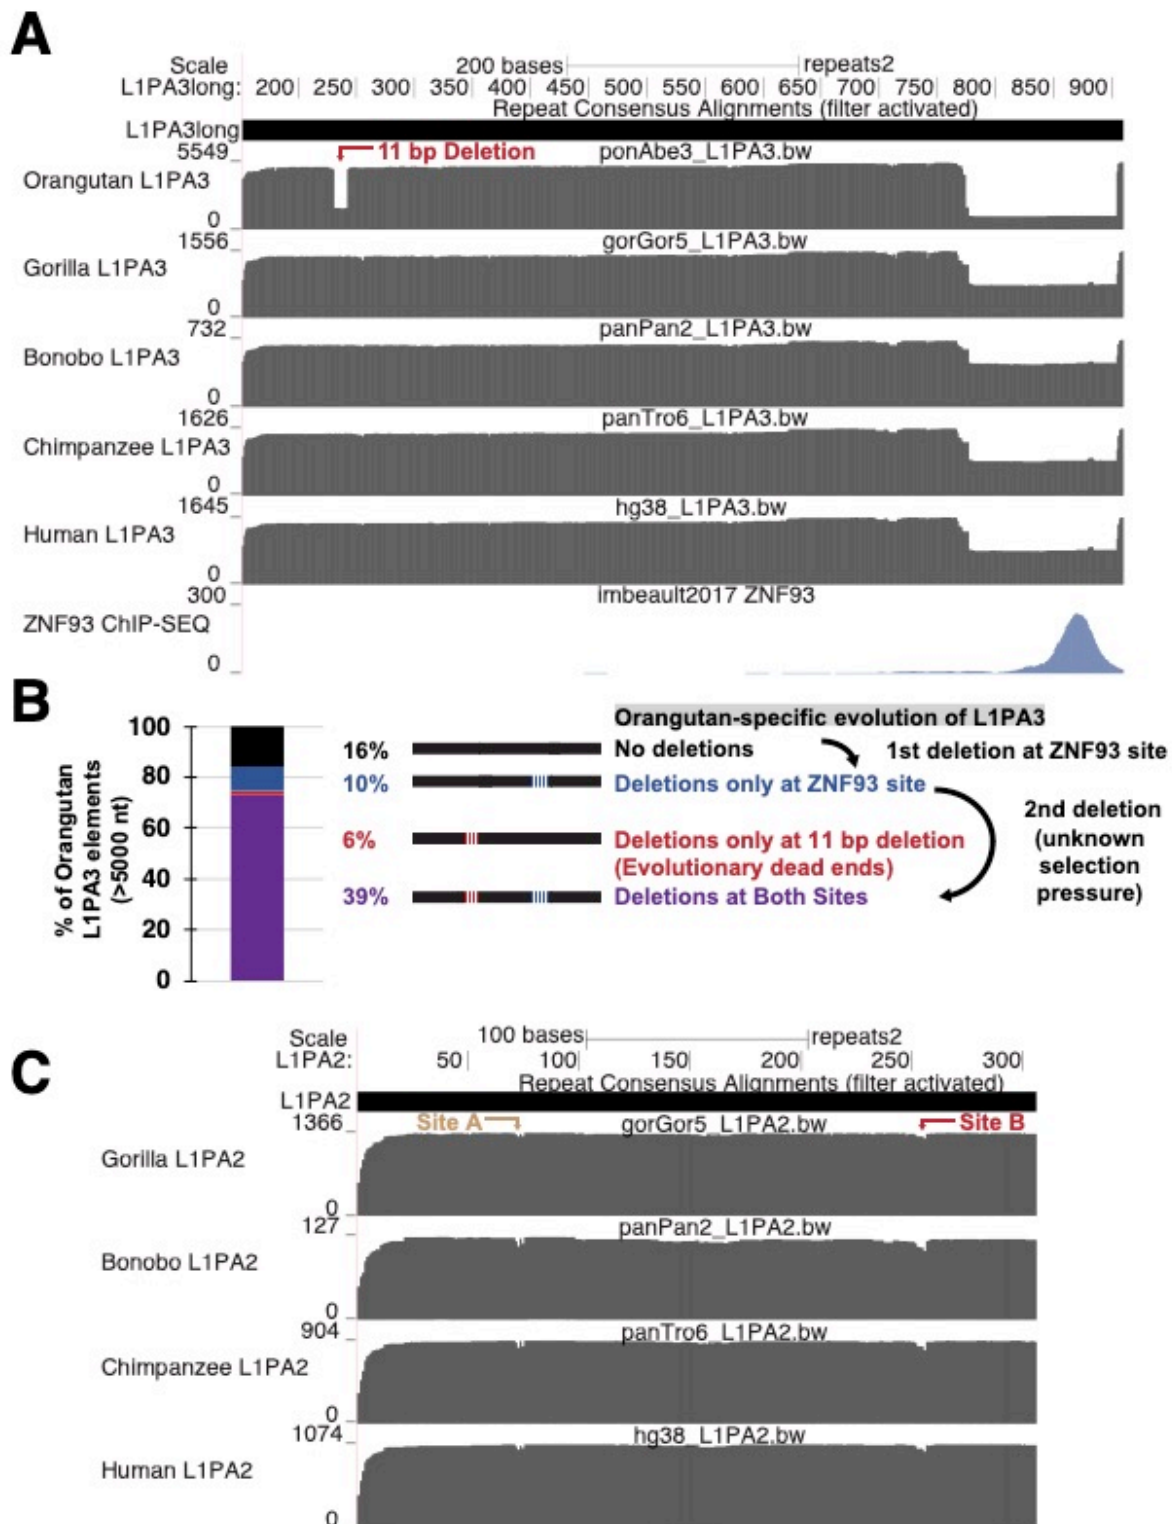

FIGURE 6: L1PA evolution in great apes. A) Coverage maps of L1PA3 demonstrate shared deletion of the ZNF93 binding site and an additional 11 bp deletion found only in orangutans. B) Analysis of the mutational pattern of orangutan elements suggests that the orangutan-specific mutation (red) occurred after ZNF93 evasion (blue) since this mutation is found almost exclusively in elements with the 129-bp deletion already. C) A) Coverage map of L1PA2 instances demonstrates no major changes across primates except for small deletions in an extreme 5' region (Site A) and a region proximal to the orangutan deletion (Site B).

286

## 287 **No major deletions are visible in primate L1PA2 elements**

288 Mapping of L1PA2 elements in gorilla, bonobo, chimp and human to the Repeat

289 Browser reveals only minor changes between these relatively young elements. (Figure

290 6C) Although gorilla L1PA2 elements have greatly expanded compared to other

291 primates, no significant gorilla-specific deletions are visible in our coverage plots;

292 therefore the spread of gorilla elements may reflect the lack of a control factor that

293 evolved in bonobo, chimpanzees and humans, or may reflect more subtle point

294 mutations as we recently demonstrated for L1PA escape from ZNF649 control <sup>34</sup>.

295 Curiously, all four species show minor coverage drops in the area around nucleotide

296 250 (site B), a region that roughly corresponds to the deletion event observed in

297 orangutan L1PA3 elements (Figure 6C). Although the deletion frequencies in primate

298 L1PA2 are relatively low compared to the 11 bp L1PA3 orangutan deletion, this overall

299 behavior is consistent with the model that this region is under adaptive selection -

300 possibly to escape repression from a still unknown KZNF.

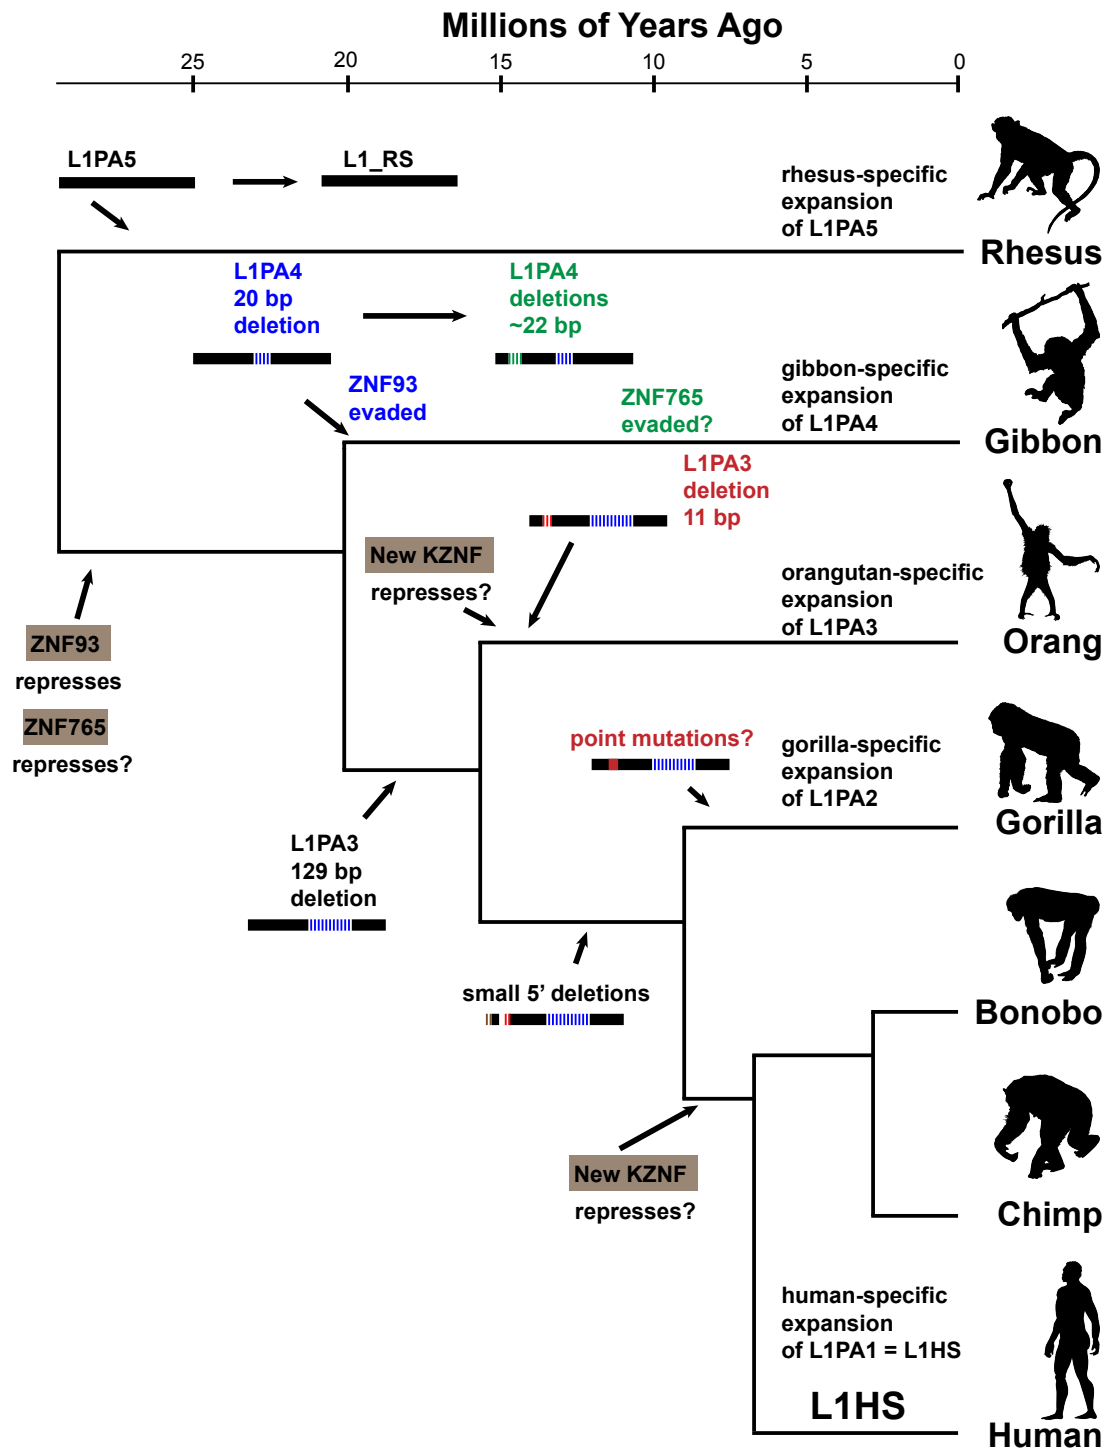

FIGURE 7: Model for L1PA evolution in different primate species. L1PA5 was active in the ancestor of human and rhesus, and expanded in a rhesus-specific fashion. ZNF93 evolved in the common ancestor of gibbons and humans (ape ancestor) to repress L1PA4 elements. In gibbons L1PA4 escaped with a small 20 bp deletion (blue); a second gibbon-specific deletion event (green) near the ZNF765 binding site led to gibbon-specific expansion of L1PA4. In great apes (human-orangutan ancestor) a 129 bp deletion (blue) in L1PA3 allowed ZNF93 evasion. In orangutans

(possibly in response to an orangutan specific KZNF) a new 11 bp deletion occurred and lead to orangutan-specific expansion of L1PA3. In gorillas, continued expansion of L1PA2 is not associated with deletions in the 5'UTR suggesting that this expansion is due either to lack of a chimp/bonobo/human repression factor or point mutations in gorilla L1PA2. A few gorilla, bonobo and human L1PA2 instances experience small deletions (brown and red); the red deletions are in a similar location to the orangutan L1PA3 deletion.

301

## 302 **DISCUSSION**

303 The UCSC Repeat Browser provides an interactive and accessible environment to  
304 study repeat biology and side-steps the problem of mistakenly mapping reads to an  
305 incorrect locus by generating consensus representations of every repeat class, and  
306 focusing on how genome-wide datasets interact with repeat sequences independent of  
307 their genomic locus. Here we use this consensus-based approach to identify deletion  
308 events in repeats across species that suggest a model by which L1PA escape occurs  
309 differently across the phylogenetic tree of old world monkeys (Figure 7).

310

311 However, several caveats should be noted about Repeat Browser-based analyses.  
312 First, they rely entirely on RepeatMasker classifications (and in turn RepBase) and  
313 therefore depend on the quality of the annotations established in these collections.  
314 Second, the Repeat Browser uses its own consensus sequences to display genomic  
315 data, with these choices biased by length in order to ensure proper visualization, which  
316 can otherwise be problematic in regions where sequence is inserted. However, custom  
317 versions of the browser allow users to provide a custom consensus sequence. Indeed,  
318 we previously used this approach to create consensus of L1PA3 subclasses  
319 (L1PA3long and L1PA3short (containing the ZNF93-related 129bp deletion)) when  
320 tracing an evolutionary arms race between ZNF93 and L1PA3 elements.<sup>10</sup> Finally, the  
321 Repeat Browser and other consensus-based approaches risk diluting important,



322 biologically relevant signal driven by a few instances of a repeat type that may affect the  
323 cell by virtue of their genomic location instead of their sequence. In these cases, the  
324 majority of instances in these families may generate no signal and produce an  
325 underwhelming “composite” Repeat Browser signal whereas an individual genomic  
326 locus may produce a strong, reproducible, and functionally relevant signal. Therefore,  
327 we recommend that Repeat Browser analysis be used in combination with existing  
328 genomic approaches for repeat analysis<sup>9,35–37</sup>. Finally, the existence of the UCSC  
329 Repeat Browser as a complete “repeat genome collection” available for download  
330 should allow manipulation and utilization of repeat consensus sequences with a large  
331 set of existing, standard genomics tools, thereby enhancing the investigation of repeat  
332 sequence biology. We expect that the repeat community will make creative use of this  
333 tool beyond the workflows suggested here.

334

## 335 **CONCLUSIONS**

336 The UCSC Repeat Browser provides a fully interactive environment, analogous to the  
337 UCSC Human Genome Browser, to study repeats. We show here that this environment  
338 provides an intuitive visualization tool for analysis and hypothesis-generation. For  
339 instance, here we use the Repeat Browser to demonstrate that sequence-specific  
340 deletions in repeats apparently driven by the activity of cellular repressors occurs  
341 independently in different species. The Repeat Browser is currently available at:  
342 <http://bit.ly/repbrowser> .

343

344

345 **Project name:** The UCSC Repeat Browser



346 **Project home page:** <https://github.com/maximilianh/repeatBrowser>

347

348 **Operating system(s):** Standard Web Browser

349 **Programming language:** Python, bash

350 **License:** Freely available for academic, nonprofit, and personal use.

351 **Any restrictions to use by non-academics:** Use of liftOver requires commercial

352 license: <http://genome.ucsc.edu/license>

353 **Tutorial:** <http://bit.ly/repbrowsertutorial>

354

## 355 **FUNDING**

356 This work was supported by EMBO ALTF 292-2011 and 4U41HG002371 to MH,

357 F32GM125388 to JDF and 1R01HG010329 to SRS. DH is an investigator of the

358 Howard Hughes Medical Institute.

359

## 360 **AUTHORS' CONTRIBUTIONS**

361 MH developed the concept for the Repeat Browser with input from all other authors.

362 JDF developed the Repeat Browser tutorial and materials for general release. JDF and

363 AZ analyzed KZNF and repeat data. MH, JDF, SRS, WJK and DH conceived of the idea

364 and contributed to the Repeat Browser's design. JDF, SRS and MH wrote the

365 manuscript.

366

## 367 **ACKNOWLEDGEMENTS**

368 We thank A. Smit, R. Hubley, and A. Ewing for helpful discussions about repeat  
369 consensus choice and annotations. We thank J. Armstrong, F. Jacobs and D.  
370 Greenberg and all members of the Haussler lab for helpful comments and discussion.

371

372

## 373 REFERENCES

- 374 1. Slotkin, R. K. The case for not masking away repetitive DNA. *Mob. DNA* **9**, 15  
375 (2018).
- 376 2. Chuong, E. B., Elde, N. C. & Feschotte, C. Regulatory activities of transposable  
377 elements: from conflicts to benefits. *Nat. Rev. Genet.* (2016).  
378 doi:10.1038/nrg.2016.139
- 379 3. Pastuzyn, E. D. *et al.* The Neuronal Gene Arc Encodes a Repurposed  
380 Retrotransposon Gag Protein that Mediates Intercellular RNA Transfer. *Cell* **173**,  
381 275 (2018).
- 382 4. Ding, Y., Berrocal, A., Morita, T., Longden, K. D. & Stern, D. L. Natural courtship  
383 song variation caused by an intronic retroelement in an ion channel gene. *Nature*  
384 **536**, 329–332 (2016).
- 385 5. Tam, O. H. *et al.* Postmortem Cortex Samples Identify Distinct Molecular  
386 Subtypes of ALS: Retrotransposon Activation, Oxidative Stress, and Activated  
387 Glia. *Cell Rep.* **29**, 1164-1177.e5 (2019).
- 388 6. Bao, W., Kojima, K. K. & Kohany, O. Repbase Update, a database of repetitive  
389 elements in eukaryotic genomes. *Mob. DNA* **6**, 11 (2015).
- 390 7. Smit, A., Hubley, R. & Green, P. RepeatMasker Open-4.0.

391 <http://www.repeatmasker.org>

- 392 8. Jurka, J., Walichiewicz, J. & Milosavljevic, A. Prototypic sequences for human  
393 repetitive DNA. *J. Mol. Evol.* **35**, 286–291 (1992).
- 394 9. Goerner-Potvin, P. & Bourque, G. Computational tools to unmask transposable  
395 elements. *Nat. Rev. Genet.* **1** (2018). doi:10.1038/s41576-018-0050-x
- 396 10. Jacobs, F. M. J. *et al.* An evolutionary arms race between KRAB zinc-finger  
397 genes ZNF91/93 and SVA/L1 retrotransposons. *Nature* **516**, 242–5 (2014).
- 398 11. Sun, X. *et al.* Transcription factor profiling reveals molecular choreography and  
399 key regulators of human retrotransposon expression. *Proc. Natl. Acad. Sci. U. S.*  
400 *A.* **115**, E5526–E5535 (2018).
- 401 12. Edgar, R. C. MUSCLE: multiple sequence alignment with high accuracy and high  
402 throughput. *Nucleic Acids Res.* **32**, 1792–7 (2004).
- 403 13. Kent, W. J. *et al.* The Human Genome Browser at UCSC. *Genome Res.* **12**, 996–  
404 1006 (2002).
- 405 14. Haeussler, M. *et al.* The UCSC Genome Browser database: 2019 update. *Nucleic*  
406 *Acids Res.* **47**, D853–D858 (2019).
- 407 15. Kent, W. J. BLAT---The BLAST-Like Alignment Tool. *Genome Res.* **12**, 656–664  
408 (2002).
- 409 16. Benson, G. Tandem repeats finder: a program to analyze DNA sequences.  
410 *Nucleic Acids Res.* **27**, 573–80 (1999).
- 411 17. Rice, P., Longden, I. & Bleasby, A. EMBOSS: the European Molecular Biology  
412 Open Software Suite. *Trends Genet.* **16**, 276–7 (2000).
- 413 18. Kohany, O., Gentles, A. J., Hankus, L. & Jurka, J. Annotation, submission and

- 414 screening of repetitive elements in Repbase: RepbaseSubmitter and Censor.  
415 *BMC Bioinformatics* **7**, 474 (2006).
- 416 19. Altschul, S. F., Gish, W., Miller, W., Myers, E. W. & Lipman, D. J. Basic local  
417 alignment search tool. *J. Mol. Biol.* **215**, 403–410 (1990).
- 418 20. Harrow, J. *et al.* GENCODE: the reference human genome annotation for The  
419 ENCODE Project. *Genome Res.* **22**, 1760–74 (2012).
- 420 21. Hsu, F. *et al.* The UCSC Known Genes. *Bioinformatics* **22**, 1036–1046 (2006).
- 421 22. ENCODE Project Consortium. An integrated encyclopedia of DNA elements in the  
422 human genome. *Nature* **489**, 57–74 (2012).
- 423 23. Imbeault, M., Helleboid, P.-Y. & Trono, D. KRAB zinc-finger proteins contribute to  
424 the evolution of gene regulatory networks. *Nature* **543**, 550–554 (2017).
- 425 24. Najafabadi, H. S. *et al.* C2H2 zinc finger proteins greatly expand the human  
426 regulatory lexicon. *Nat. Biotechnol.* **33**, 555–62 (2015).
- 427 25. Thomas, J. H. & Schneider, S. Coevolution of retroelements and tandem zinc  
428 finger genes. *Genome Res.* **21**, 1800–12 (2011).
- 429 26. Leinonen, R., Sugawara, H., Shumway, M. & International Nucleotide Sequence  
430 Database Collaboration. The sequence read archive. *Nucleic Acids Res.* **39**, D19-  
431 21 (2011).
- 432 27. Langmead, B. & Salzberg, S. L. Fast gapped-read alignment with Bowtie 2. *Nat.*  
433 *Methods* **9**, 357–359 (2012).
- 434 28. Zhang, Y. *et al.* Model-based analysis of ChIP-Seq (MACS). *Genome Biol.* **9**,  
435 R137 (2008).
- 436 29. Khan, H., Smit, A. & Boissinot, S. Molecular evolution and tempo of amplification

- 437 of human LINE-1 retrotransposons since the origin of primates. *Genome Res.* **16**,  
438 78–87 (2006).
- 439 30. Konkkel, M. K., Walker, J. A. & Batzer, M. A. LINEs and SINEs of primate  
440 evolution. *Evol. Anthropol.* **19**, 236–249 (2010).
- 441 31. Han, K. *et al.* Mobile DNA in Old World monkeys: A glimpse through the rhesus  
442 macaque genome. *Science (80-. )*. **316**, 238–240 (2007).
- 443 32. Schmitges, F. W. *et al.* Multiparameter functional diversity of human C2H2 zinc  
444 finger proteins. *Genome Res.* **26**, 1742–1752 (2016).
- 445 33. Larson, P. A. *et al.* Spliced integrated retrotransposed element (SpIRE) formation  
446 in the human genome. *PLoS Biol.* **16**, (2018).
- 447 34. Fernandes, J. D. *et al.* KRAB Zinc Finger Proteins coordinate across evolutionary  
448 time scales to battle retroelements. *bioRxiv* 429563 (2018). doi:10.1101/429563
- 449 35. Jeong, H. H., Yalamanchili, H. K., Guo, C., Shulman, J. M. & Liu, Z. An ultra-fast  
450 and scalable quantification pipeline for transposable elements from next  
451 generation sequencing data. in *Pacific Symposium on Biocomputing* **0**, 168–179  
452 (World Scientific Publishing Co. Pte Ltd, 2018).
- 453 36. Jin, Y., Tam, O. H., Paniagua, E. & Hammell, M. Tetrascripts: A package for  
454 including transposable elements in differential expression analysis of RNA-seq  
455 datasets. *Bioinformatics* **31**, 3593–3599 (2015).
- 456 37. Kong, Y. *et al.* Transposable element expression in tumors is associated with  
457 immune infiltration and increased antigenicity. *Nat. Commun.* **10**, 5228 (2019).  
458
